# Supplementary material for: Diffuse optical spectroscopic imaging reveals distinct early breast tumor hemodynamic responses to metronomic and maximum tolerated dose regimens
Source: Springer Nature journal article supplement (doi:10.1186/s13058-020-01262-1), 2020-03-13
Supplement: MOESM1 [file 17797520]

**Responders Cohort: MTD vs MET**

| <b>Days Postchemotherapy</b> | <b>Difference Estimate %HbO2</b> | <b>Standard Error</b> | <b>Z value</b> | <b>P Value</b> |
|------------------------------|----------------------------------|-----------------------|----------------|----------------|
| 1                            | 39.4548                          | 11.9849               | 3.29           | 0.001          |
| 2                            | 27.6914                          | 15.5288               | 1.78           | 0.0745         |
| 3                            | 45.1494                          | 15.8659               | 2.85           | 0.044          |
| 4                            | 29.1872                          | 14.0117               | 2.08           | 0.0372         |
| 5                            | 18.733                           | 12.8497               | 1.46           | 0.1449         |
| 6                            | 27.1901                          | 14.8437               | 1.83           | 0.067          |
| 7                            | 9.7234                           | 15.4755               | 0.63           | 0.5298         |

Table S1A) Post-hoc GEE Estimates of Oxyhemoglobin differences across Treatment of Responding patients on days 1-7. Significance is determined at Bonferroni corrected level of  $p < 0.0036$ .

**MTD Cohort: Responders vs Non-Responders**

| <b>Days Postchemotherapy</b> | <b>Difference Estimate %HbO2</b> | <b>Standard Error</b> | <b>Z value</b> | <b>P Value</b> |
|------------------------------|----------------------------------|-----------------------|----------------|----------------|
| 1                            | 48.7737                          | 9.5129                | 5.13           | <.0001         |
| 2                            | 28.8053                          | 14.3329               | 2.01           | 0.0059         |
| 3                            | 48.897                           | 15.0479               | 3.25           | 0.0012         |
| 4                            | 38.9028                          | 12.8756               | 3.02           | 0.0025         |
| 5                            | 19.6682                          | 16.6273               | 1.18           | 0.2369         |
| 6                            | 38.1247                          | 13.3738               | 2.85           | 0.044          |
| 7                            | 25.3257                          | 13.3915               | 1.89           | 0.0586         |

Table S1B) Post-hoc GEE Estimates of Oxyhemoglobin differences across Response of MTD patients on days 1-7. Significance is determined at Bonferroni corrected level of  $p < 0.0036$ .
